# Supplementary material
Source: Springer Nature journal article supplement (https://www.springermedizin.de/resource/supplementary/12885_2004_188_MOESM1_ESM.pdf/9469112)
Supplement: MOESM1 [file 9469112]

|                     |      |                                                                                     |                                                |                                     |                    |      |
|---------------------|------|-------------------------------------------------------------------------------------|------------------------------------------------|-------------------------------------|--------------------|------|
| YEDZ_ECOLI          | 71   | PLLIRTRRLGLWCFAWATLHLTSLALLELGV                                                     | ..NNLALLGKELITRPLYLTLGIISWVLLALAFSTSQAMQRK     | .LG.KHWQQLH.NFVYLVAI.LAPIHYL        | 166                |      |
| Y986_PSESM          | 66   | PGWIVRRQLGLWCFAVYVLMYALFILG                                                         | ..LDWGQLVGLVKRPYIIVCALAFGLGLALAVTSNRSYQRR      | .LG.SRWKKLH.RLVYVILG.LGLLHFL        | 160                |      |
| YAH5_PSEPK          | 66   | SGWIVRRQLGLWVFAYIVLHILCYLFFILG                                                      | ..LDWGQVLAVELKRPYIIVCALGFLGLLVAVTSNRSYQRR      | .LG.ARWKKLH.RLVYAVLG.LGLLHFL        | 160                |      |
| YAJ1_PSEMU          | 66   | PGWIAVRRLGLWCFTYVLLHLSAYVFFILG                                                      | ..LDWGQVLGIELSKRPYIIVCMGLGFVCLFLAITSNRFAMRK    | .LG.SRWKKLH.RLVYVILG.LGLLHFL        | 160                |      |
| Y538_PASAE          | 68   | PQLQVLRRLGLWAWFYVVLVYAYLAELG                                                        | ..YDFSLFQBELVNRGYLLICAIAPLIRLMLALSSSYLKLK      | .MG.KRWFKLH.QLGYVALL.LGAIHYV        | 162                |      |
| YG46_XANAC          | 77   | AVVIRFRMLGLYAFYATVHLAAYLTLDR                                                        | ..GFWOTIFEIILKRPYITVCPAAWLLLMLPLAITSQGWMMR     | .LK.RNWGRHL.MLIYPIGL.LAVLHFV        | 171                |      |
| Y1G5_BORBR          | 74   | PALVRLRRMCLGFAFFYGSLEFLAWVWDRG                                                      | ..LDPVSMLOQVGERPFIIVCPAAFVLMALAAATSTQWAMRK     | .LG.KRWQVHL.RYVAIYL.LAILHFV         | 168                |      |
| YT80_RALSO          | 74   | NWLIRIRRMGLGYTFYGTLEFLIWLVLVDRG                                                     | ..LDPASMKVDIAKRPYITVCPAAFVLMPLAATSTNAMVRR      | .LGGRRWQVHL.RLVYVTGV.LGILHYV        | 169                |      |
| YR47_CAUCR          | 78   | PRLVRFRRTVGLFAPAYVALHLLAYVGLD                                                       | ..FPDWNQLWKDILKRPYITLGMGLFMVLIPLAVTSNNGWIR     | .MGRAAWSRHL.RLVYVLPV.LGVAHYV        | 173                |      |
| Y304_BRUME          | 78   | ITLLRYRRALGLLAFYALMHEFTTMYVLDQG                                                     | ..LNLSAIIITDIRRPFITIGMISLALLVPLAITSNWSYR       | .LG.RRWSSHL.KLIVYIAI.GSAVHYL        | 172                |      |
| YD20_RHIME          | 74   | VNWLRYRRALGLLAFYVMMHFLTVMVLDQT                                                      | ..LLLPAIVDAIARRPFITIGMAALVLLIPLAVTSNWSYR       | .LG.QRWNKHL.RLVYVIAA.AGALHFA        | 168                |      |
| YJ82_AGRT5          | 77   | VNLIAYRRALGLIAFYVLAHFTVYVLDVRG                                                      | ..LLGSIVAGDILKRPYIMLGMAGLIIILPLAITSNRSYR       | .LG.SRWNTHL.KLVYLVLI.VGVLFHV        | 171                |      |
| YP37_DEIRA          | 71   | TWAARIRKALGLLAFYAVLHFGIYLRGQD                                                       | ..FSLGRIWEDVTERPFITSCFAALLLLLPLVLTSGKGSVRR     | .LGFARWTLH.RLVYLAIA.LGALHYV         | 165                |      |
| Q7NFG8_glovi        | 82   | PGLQERRYLGLLTFAPSVLHTWSQIEH                                                         | ..VLGSSLDGMFFLPDRMQFVGLFCIFALLAMPLAATSTDAWTR   | .LK.KAWKQLH.QGVFPAF.LIVLTLT         | 177                |      |
| Q8YN59_Anasp        | 273  | ASPLNRYRAALGVGAFVLSVVTHTTHMIQHS                                                     | ..LDWNFAAFFLPPQFQIGMAACAVALIMLTPAFTSWESWQKS    | .LG.YWRQRIH.LLISVPALL.LSAIHAV       | 368                |      |
| Q97Lk5_Cloac        | 91   | KKLVAIRAQMAIMASIFIPFHVCIYLYVVKL                                                     | ..YTFPVEIVDKGSIELFTAAYILACIIAIFIMMPLFIITSK     | .L.KVRRKMNQVKKWKLQ.RWAYLFLV.LVGVHL  | 190                |      |
| Y572_TREPA          | 87   | QRVMGLRAELAITAAILTGHVNIH                                                            | ..GRDYLVRLCGSTGDLSTGVLVAGAVSMVLLMSLITSFSK      | .VFLRRMGAKTKWRVQ.RLAYFYGL.LTVVHLS   | 183                |      |
| STEA_HUMAN          | 155  | DKWMLTRKQGLLSFFFAVHLAIYSLSYPMRRSRYKLLN                                              | ..WAYQQVQNKEDAWIEHDVWRMIEIVSGLIVGLAALLAVTSIP   | .SVSDSLTREFHFYQSKLGIYSVL.LGTIHAL    | 270                |      |
| Q8NFT2_STEAP2_Homsa | 296  | ETWLQCRKQGLLSFFFAVHVAYSLLCPMRRSRYKLLN                                               | ..MAYQQVHANIENSWNEEVEWRMIEIVSGLIMSGLLSLAVTSIP  | .SVSNALNWRREFSFTQSLTGYVALL.ISTPHAL  | 411                |      |
| Q865F6_TSAP6_Homsa  | 296  | DHWLQHRKQIGLSFFFAALHVALSFCPLPRAHRYDLVN                                              | ..LAVKQVLANKSHLWEEVEVWRMIEIVSGLVLALETLSLAVTSIP | .SVSNALNWRREFSFTQSLTGYVALL.LSTLTLT  | 411                |      |
| Q91W31_TIARP_Musmu  | 284  | DHWMLCRKQGLVLAFLAFLEIVYITLVPIRYYVWRLLRN                                             | ..ATIIQALTNKSDPFTISYAWINDSYLALCIGLGFYLLGLTSLP  | .SVSNMNNWRREFSFTQSKLGYLTLV.LCTAHTL  | 399                |      |
| Q6PAY4_Xenla        | 283  | DTWMLCRKQGLVLAFLAFLEIVYITLVPIRYYVWRVNSN                                             | ..YIITQIKNTNYFELNYSYAWLSDSYVALCIGLGFYLLGLTSLP  | .SVSNMNNWRREFSFTQSKLGYLTLV.LCTAHTL  | 398                |      |
| Q6P7H1_Xenla        | 284  | DQWMLCRKQGLIALSVALLEIVYITLVPIRYYVRYRINS                                             | ..NIITQIKLNTRTFDNTLAWRTDAYIALCIGLGFYVLLGLTSLP  | .SVSNMNNWRREFSFTQSKLGYLTLV.LCTGHAL  | 399                |      |
| Q12209_L2114_Sacce  | 146  | LALLPLHKWISRIVLESILHTWYFL                                                           | ..YYMYINDTLVYKMRKLPNIYGVIALGLFLLIATSVR         | .YARR.WSYRVFYVH.YVSTWILVFLVHAR      | 238                |      |
| YGR0_YEAST          | 130  | TDFIPFHKWFSRITIVIGLLGFIIFIKW                                                        | ..AIDDNVFAFFLQKLIKTFNFACPIIISLVLFLLCSIG        | .PMRR.YSRYRIFYVH.HLVNVAFILLTPIHSR   | 225                |      |
| C24B_HUMAN          | 94   | DRNLTFFHKMVAWMIALHSAITIAHLNFVVEVCYRNVNNSDPYSVALSELGRQNESYLNFAARKIKNPEGLLYLAVTLLAGIT | ..VUITLCLILITISSTK.TIRR.SYFVVFYWH              | .HLFVFFIY.GLAIHGA                   | 223                |      |
| NOX1_HUMAN          | 95   | DHNLTFHKLVAYMICLHTAIIIAHLNFVDCYSRQATDGLSASILSLGSHDEK.KGGSWLNPIQRNTEITVEYVFTSIAGLT   | ..GVIMTIALILMVTSAE.FIRR.SYFVVFYWH              | .HLFIFIPYL.GLGIHGI                  | 223                |      |
| Q8JON4_noxA_Emeni   | 91   | DENIWFHRQVAYATVLTGLVAAHVNFYFN                                                       | ..IERKQLRPETALQIHYAQPAVGT                      | .HVMFLFCMMLYTAHH.RIRQ.QSFETFYWH     | .HLFIFPFL.GLYTHAT  | 190  |
| Q9XY33_Dicdi        | 95   | DKNIVFHKLIWVICFATFGLGVMAHFNFRYQDITP                                                 | ..QEQYKRILIDYPNLPIKYA.FATLAGWT                 | .HVCVIMVMLMYTSAVE.SIRR.PMFEFVYWH    | .HLFVFFVGL.LLVVHGL | 205  |
| Q7Z7G3_NOX4_Homsa   | 99   | DKSRTFFHITGVITICIFSGVVAHLLNALNFSVNSYSED                                             | ..FVELNAARYRDEBDRKLLFTVPGMT                    | .GVMNVVLPMLTASTY.AIRV.SNYDIFYWH     | .NLFFVFFYM.LLTLHVS | 209  |
| Q8MX00_Dicdi        | 659  | DKYMTFHKLIGYTLIIASFLTIGVGMVAVATGKDPN                                                | ..IFYDLPALPHFKRPTVWEMIFNSLPGV                  | .CPIMIISFLIIMALSLK.IIRK.SNFHFLFYSH  | .HLFIFIGYV.LLILHGT | 770  |
| O61213_Caeel        | 1067 | D5AIAFHKIVAFAPFAWTLTGVCHVSYVWFTSQBGLAC                                              | ..LQFAEAFSGSNFLPISYVWFTSITGLT                  | .GIALVAVMCIYVFLSK.CPIK.RAYHAFRLTL   | .LNNIAFYA.LTLHGL   | 1181 |
| Q9VQH2_Drome        | 1047 | DSHIQFHKIAACTALFFSVLHTVGHIVNFYHVSTQSHENLRC                                          | ..LTREHVFPASDYKDPITFWLFOVTVGT                  | .GVMLFIIMCIIFFVAHP.TIRK.KAYNFFWNM   | .TLYIGLYL.LSLHGL   | 1161 |
| Q9NRD9_DUOX1_Homsa  | 1124 | DAAVDFHRLIATAIVLTVLHSGHVHNVVYLSISPLSVLSC                                            | ..LFPGLFHDDGSELQPKYVWVFFQVTPVGLT               | .GVVLLLLLAIMYVFAH.HFRR.RSFRGFWLTH   | .HLYLLYV.LLIIHGS   | 1240 |
| Q9UHf9_Homsa        | 783  | DAAVDFHRWIAAAVVLALHSGAHVNVYIFSVSPLSLAC                                              | ..IFPNVFNVDGSKLQPKFYWVFFQVTPVGMT               | .GVVLLLVLAIMYVFAH.HFRR.RSFRGFWLTH   | .HLYLLYA.LLIIHGS   | 899  |
| Q9V7N2_Drome        | 339  | DHNIVYHLKLTGITVVSLSLHTVHMLNFNLSIIVNDPNI                                             | ..NAGHYTIGEWLLTDRPGLFGLIPGCANPT                | .GVALLAIVVMVFCSSQP.FVRRKSGHFVFFYWH  | .LFLVFFVI.LCLFHGP  | 453  |
| Q96PH1_Homsa        | 308  | DQNIQFHQLMGVYVLSLHTVHMLNFVFLQAQA                                                    | ..EASPQFQWELLTTRPGIGV.HVGSASPT                 | .GVALLLLLLWVCCSSQ.CIRRSKHGFVFFYWH   | .LSYLVWL.LLHFGP    | 417  |
| P92950_FRO1_Arath   | 203  | ESSIKYHIWGLHVMIFTSBGLCYFIYW                                                         | ..ISKNLQVSKMLEDWRTAVSNLAGEIALVAGLMMWATTYP      | .KIRR.RLFEVFFYSH.YLYIVFML.FFVHVVG   | 299                |      |
| P92949_FRO2_Arath   | 213  | ESSIKYHIWGLHVMVMAFTVHGLCYFIYW                                                       | ..ASMHEISQIMWDTKGVSNLAGEIALVAGLMMWATTYP        | .KIRR.RFFEVFFYTH.YLYIVFML.FFVHVVG   | 308                |      |
| FRE2_YEAST          | 310  | TSFIMFHKWLRGMRFLDAVHAGAYT                                                           | ..SYTVANKTWTASKNRLYQF                          | .GVAALCLAGTVMFFSFA.HFRR.YFYEAFFLH   | .IVLGMFFYACHEVV    | 402  |
| FRE3_YEAST          | 310  | TSFIMFHKWLRGMRFLDAVHAGAYT                                                           | ..SYSVFFYKDWAAKETYVQF                          | .GVAALCIYVGMVFFSFA.MFRK.FFYEAFFLH   | .IVLGMFFYTCHEVV    | 402  |
| FRE4_YEAST          | 303  | TSFIVFHKWLRGMRFLDAIHAAGFT                                                           | ..NYLYLYKKNVTVRLRYWKF                          | .GIATTLACGLMIFFSIA.AFRY.HYEFYFMALH  | .IVFAALFLYTCHEVHT  | 395  |
| FRE5_YEAST          | 304  | TAFITVHKWLRGMRFLDCTIHAIGYT                                                          | ..YHAYIENYKVKVYSDLWTS                          | .GRHAMIVGLVLFVFSFG.FFRR.HYEFYFVITH  | .IILAGFFHACWKHKV   | 396  |
| FRE6_YEAST          | 317  | NSFISFHKWLRIMVNLATIHSLSYS                                                           | ..LFAIINHAFKISNKQLYKFK                         | .CIASITVLCVLLVLSLGF.IVRK.RHYEFFLYTH | .IILALLFFYCCQWVKV  | 409  |
| FRE1_YEAST          | 288  | STFNFYHKWSAYVCFMLAVHVSIVMTASGWRK                                                    | ..GVFQSLVRRKIFYFRW                             | .GIVATILMSIIFQSEK.VFRN.RGYEIFLLH    | .KAMNIMFIAMYHCH    | 380  |
| FREL_CANAL          | 269  | ATFIMYHRWISRVDVLLIIVHAITFSVS                                                        | ..DKATGKYKNRMKRDPMI                            | .GTVSTICGGFILQAML.FFRK.KCYEAVFLH    | .IVLVVFFVGGVYHLE   | 361  |
| FRP1_SCHPO          | 151  | EKMNYVHRRLSQYAIMIGALHGPAYI                                                          | ..GLAAQKRALLTARVTI                             | .CYVILGLMVMIVSSSLP.FFRR.RFYEAVFFVLH | .HMSCGFLITIWHLR    | 241  |
| FRE7_YEAST          | 191  | EKINIYHQWASILCLFFSWVHVIPFLRQARH                                                     | ..EGGVERMHQWRKASDMWRS                          | .GVPPILFNLMLWSSSLP.IARR.HFYEIFLQH   | .GILAVGVYISLFFHYV  | 287  |
| Q8YTT0_Anasp        | 80   | DLIQFHRYTSIVAFLEFLAHPRIIFLFINN                                                      | ..PETLQNLNFQAPWRK                              | ..AAVIATLALAIIVTSIW.RKQLNIGYENWRIAH | .GILAVIVSFGLGHV    | 174  |
| YE62_ARCFU          | 29   | SYIVKAHRLFGYISVGFLLFPLLEVLPR                                                        | ..QFEGSIQPFDAFWKIITDNSAIL                      | .GIAGAVMLTLAVTSVL.RKRLFKNYRKRWTFH   | .GILAVVLTIVVGYEVL  | 130  |

TM III

TM IV

TM V
